# Supplementary material for: Blending of HAuCl4 and histidine in aqueous solution: a simple approach to the Au10 cluster
Source: Royal Society of Chemistry journal article supplement (doi:10.1039/c1nr10287g), 2011-01-01
Supplement: c1nr10287g.pdf [file c1nr10287g.pdf]

# Supporting Information for

## Blending of H<sub>2</sub>AuCl<sub>4</sub> and Histidine in the Aqueous Solution: A Simple Approach to Au<sub>10</sub> Cluster

*Xi Yang, Minmin Shi\*, Renjia Zhou, Xiaoqiang Chen, and Hongzheng Chen\**

State Key Lab of Silicon Materials, MOE Key Laboratory of Macromolecule Synthesis and  
Functionalization, & Department of Polymer Science & Engineering, Zhejiang University, Hangzhou  
310027, People's Republic of China

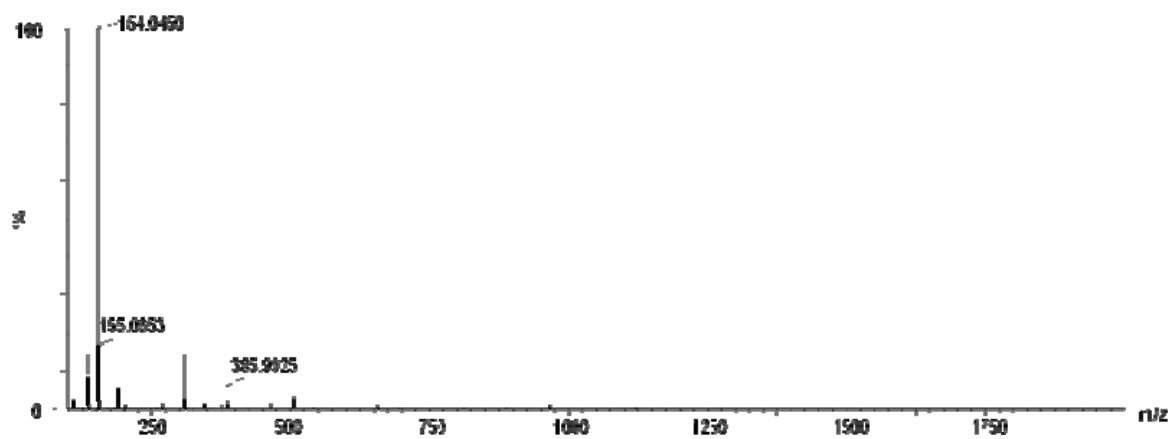

**Figure S1.** The whole mass spectrum ( $m/z = 0-2000$ ) of gold clusters dissolved in water.

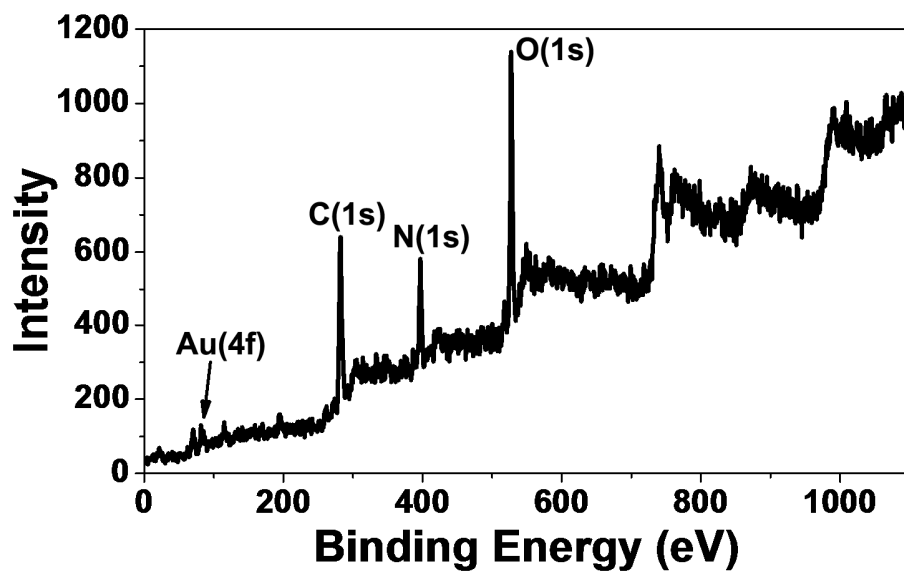

Figure S2. The whole XPS spectrum of gold clusters.

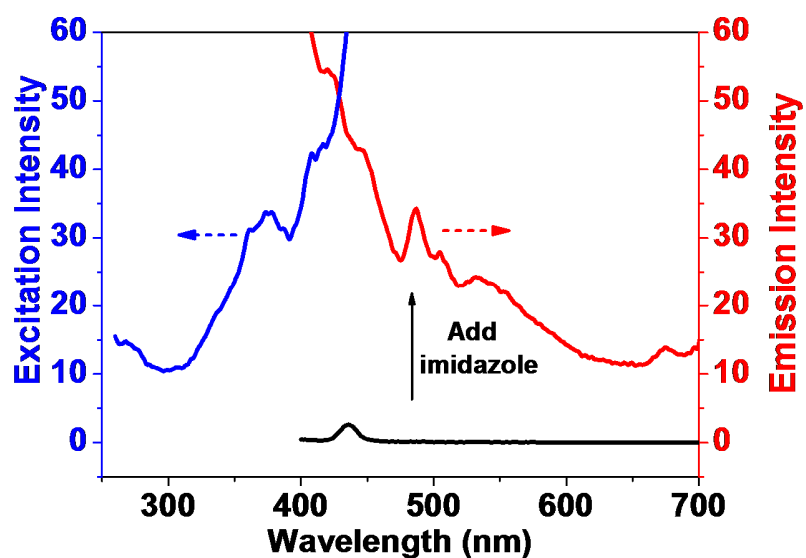

**Figure S3.** Photoluminescence excitation (blue) and emission (red) spectra of the aqueous gold cluster solution reduced by imidazole and stabilized by alanine. The emission spectra of the solution generated by mixing  $\text{HAuCl}_4$  and alanine before adding imidazole was taken as control. Concentrations of all the samples were the same.
